# Supplementary material for: Evaluation of Online Patient Portal vs Text-Based Blood Pressure Monitoring Among Black Patients With Medicaid and Medicare Insurance Who Have Hypertension and Cardiovascular Disease
Source: PubMed Central journal article supplement (PMC8848204; doi:10.1001/jamanetworkopen.2021.44255), 2022-02-15
Supplement: jamanetwopen-e2144255-s002.pdf [file jamanetwopen-e2144255-s002.pdf]

## Data Sharing Statement

Eberly. Evaluation of Online Patient Portal vs Text-Based Blood Pressure Monitoring Among Black Patients With Medicaid and Medicare Insurance Who Have Hypertension and Cardiovascular Disease. *JAMA Netw Open*. Published February 15, 2022. doi:10.1001/jamanetworkopen.2021.44255.

### Data

**Data available:** Yes

**Data types:** Deidentified participant data

**How to access data:** Deidentified participant data will be made available on reasonable request to the first author, Lauren Eberly, at lauren.eberly@pennmedicine.upenn.edu

**When available:** With publication

### Supporting Documents

**Document types:** Statistical/analytic code

**How to access documents:** Statistical/analytic code will be made available on reasonable request to the first author, Lauren Eberly, at lauren.eberly@pennmedicine.upenn.edu

**When available:** With publication

### Additional Information

**Who can access the data:** Anyone upon reasonable request

**Types of analyses:** For any research purpose

**Mechanisms of data availability:** After approval of a proposal
